# Supplementary material for: Language-qa4: a procedural calculus for intuitive reasoning.
Source: Royal Society of Chemistry journal article supplement (doi:10.1039/c9cc06528h), 1973-01-01
Supplement: c9cc06528h1.pdf [file c9cc06528h1.pdf]

## Supporting Information

### Surface engineering of ultrasmall supported Pd<sub>x</sub>Bi nanoalloys with enhanced electrocatalytic activity for selective alcohol oxidation

Chenyao Hu,<sup>a</sup> Zupeng Chen,<sup>b</sup> Fengyan Han,<sup>c</sup> Zixia Lin<sup>d</sup> and Xiaofei Yang<sup>\*c, e</sup>

---

<sup>a</sup> College of Chemical Engineering, Nanjing Forestry University, Nanjing, 210037, P. R. China.

<sup>b</sup> Institute for Chemical and Bioengineering, Department of Chemistry and Applied Biosciences, ETH Zürich, 8093 Zürich, Switzerland.

---

<sup>c</sup> College of Science, Institute of Materials Physics and Chemistry, Nanjing Forestry University, Nanjing, 210037, P. R. China.

---

<sup>d</sup> Testing Center, Yangzhou University, Yangzhou 225009, P. R. China.

<sup>e</sup> Key Laboratory for Photonic and Electronic Bandgap Materials, Ministry of Education, School of Physics and Electronic Engineering, Harbin Normal University, Harbin 150025, P. R. China.

Email: [xiaofei.yang@njfu.edu.cn](mailto:xiaofei.yang@njfu.edu.cn)

## Experimental

### Materials and chemicals

Carbon black (Vulcan XC-72R) was purchased from Cabot Corp (USA). Pd(NO<sub>3</sub>)<sub>2</sub> solution (0.94M Pd(NO<sub>3</sub>)<sub>2</sub> and 0.19M HNO<sub>3</sub>, ≥ 99.9%) was obtained from Shanghai July Chemical Co. (P. R. China). Hydrazine hydrate (HHA, ≥ 85%, AR), ethylene glycol (EG, ≥99.0%, AR) Bismuth(III) nitrate pentahydrate (AR, ≥ 99.0%), methanol (AR, ≥ 99.5%), ethanol (AR, ≥ 99.7%), 1-Propanol (AR, ≥ 99.5%), isopropanol (AR, ≥ 99.7%) were obtained from Sinopharm Chemical Reagent Co. (P. R. China). All the chemicals employed were used as received.

### Synthesis of Pd<sub>x</sub>Bi/CB

CB (100 mg) was ultrasonically dispersed in EG (200 mL containing 1.60 mL HHA) to form a uniform suspension. After ultrasonication, 250 μL Pd(NO<sub>3</sub>)<sub>2</sub> and Bi(NO<sub>3</sub>)<sub>3</sub> mixed solution (containing 2.0 M HNO<sub>3</sub>)\* was added to the above reaction system, which was further stirred for about 15 min. The resulting product was centrifuged, washed, and finally dried at room temperature in a vacuum oven overnight.

### Synthesis of Pd/CB

CB (100 mg) was ultrasonically dispersed in EG (200 mL containing 1.60 mL HHA) to form a uniform suspension. After ultrasonication, 250 μL Pd(NO<sub>3</sub>)<sub>2</sub> with 0.2 M was added to the above reaction system, which was further stirred for about 15 min. The resulting product was centrifuged, washed, and finally dried at room temperature in a vacuum oven overnight.

### Physical characterizations

Transmission electron microscopy (TEM) measurements were performed on a JEOL JEM-2100 microscope operating at 200 kV, by depositing a drop of sample dispersion onto 200 mesh Cu grids coated with a carbon layer. The powder XRD patterns were recorded on the Beijing Purkinjie general instrument XD-3 X-ray diffraction using Cu Kα radiation ( $\lambda \approx 1.54 \text{ \AA}$ ) at 35 kV and 20 mA ( $2\theta$  from 10° to 80°). A glass slide was used to place the grinded sample. X-ray photoelectron spectroscopy (XPS) was performed on a RBD upgraded PHI-5000C ESCA system (Perkin Elmer) with Al K  $\alpha$  radiation ( $h\nu = 1486.6 \text{ eV}$ ). Inductively coupled plasma-optical emission spectroscopy (ICP-OES) experiments was performed on a Varian 720-ES spectrometer.

---

\*For Pd<sub>8</sub>Bi/CB synthesis, c[Pd(NO<sub>3</sub>)<sub>2</sub>] = 0.75 M, c[Bi(NO<sub>3</sub>)<sub>3</sub>] = 0.09 M;  
For Pd<sub>4</sub>Bi/CB synthesis, c[Pd(NO<sub>3</sub>)<sub>2</sub>] = 0.63 M, c[Bi(NO<sub>3</sub>)<sub>3</sub>] = 0.16 M;  
For Pd<sub>2</sub>Bi/CB synthesis, c[Pd(NO<sub>3</sub>)<sub>2</sub>] = 0.47 M, c[Bi(NO<sub>3</sub>)<sub>3</sub>] = 0.24 M.

### **Electrochemical measurements**

Electro-catalytic activities of samples were measured in a conventional three-electrode cell using a CHI 760D electrochemical workstation. The electrode assembly consists of a Pt wire as the counter electrode, and a mercuric oxide electrode with double salt bridges as the reference electrode in alkaline medium, a glassy carbon disk (3 mm in diameter) coated with 10  $\mu\text{g}$  catalyst as the working electrode. Before the preparation of the catalysts modified GCE, the GCE was polished with 1, 0.3 and 0.05  $\mu\text{m}$   $\alpha\text{-Al}_2\text{O}_3$ , sequentially. 10 mg catalysts was ultrasonically dispersed in 5.0 mL mixture of water and 5% Nafion solution ( $v[\text{water}] : v[\text{Nafion solution}] = 60:1$ ) for 1 min. 5  $\mu\text{L}$  of as-prepared mixture was carefully injected on the glassy carbon disk and dried in the air for 3 h at room temperature. No ohmic-drop compensation was applied to any of the performed experiments. All the potentials were given on the reversible hydrogen electrode (RHE) scale.

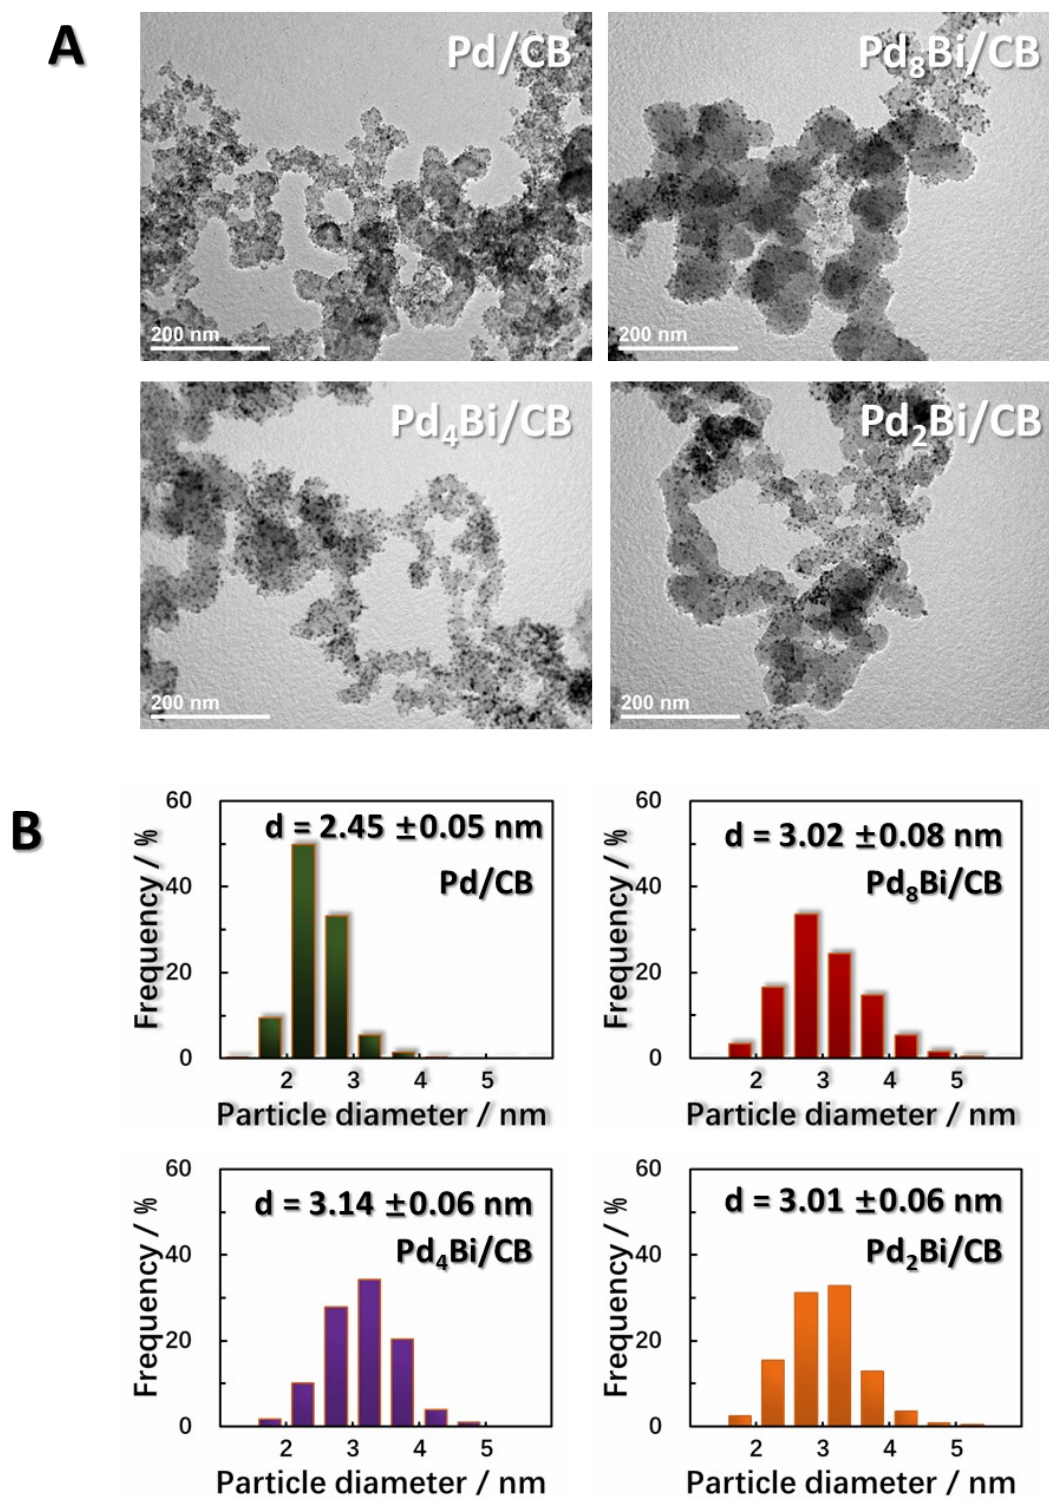

**Fig. S1.** High-magnification TEM images (A), the histograms of particle size distributions (B) of Pd/CB and Pd<sub>x</sub>Bi/CB nanocomposites.

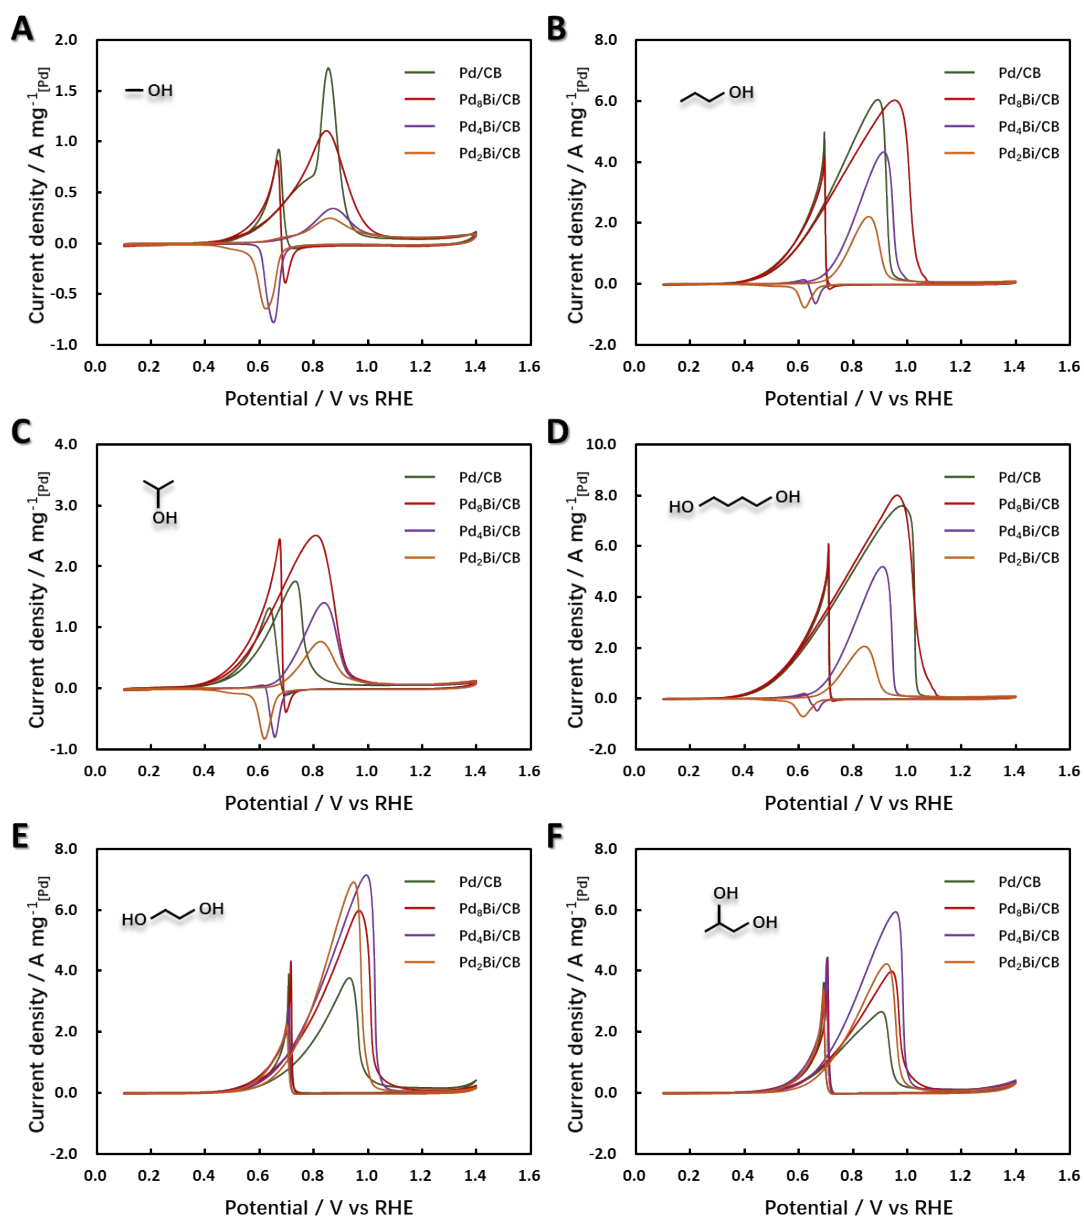

**Fig. S2.** CV curves recorded for the oxidation of different alcohols (1.0 M) in 1.0 M NaOH solutions (scan rate = 50 mV/s).

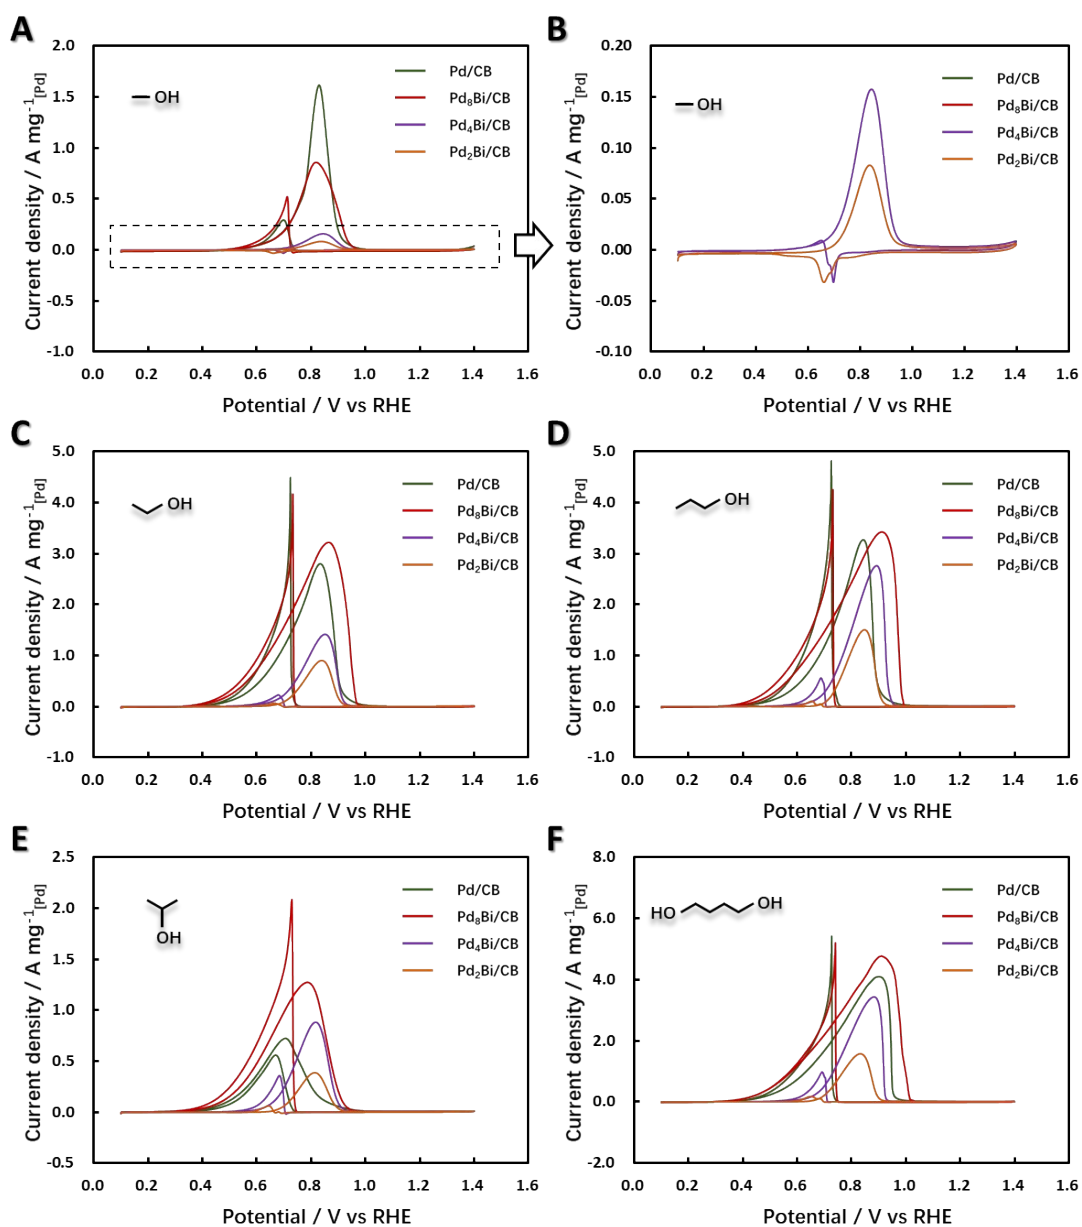

**Fig. S3.** CV curves recorded for the oxidation of different alcohols (1.0 M) in 1.0 M NaOH solutions (scan rate = 2 mV/s).

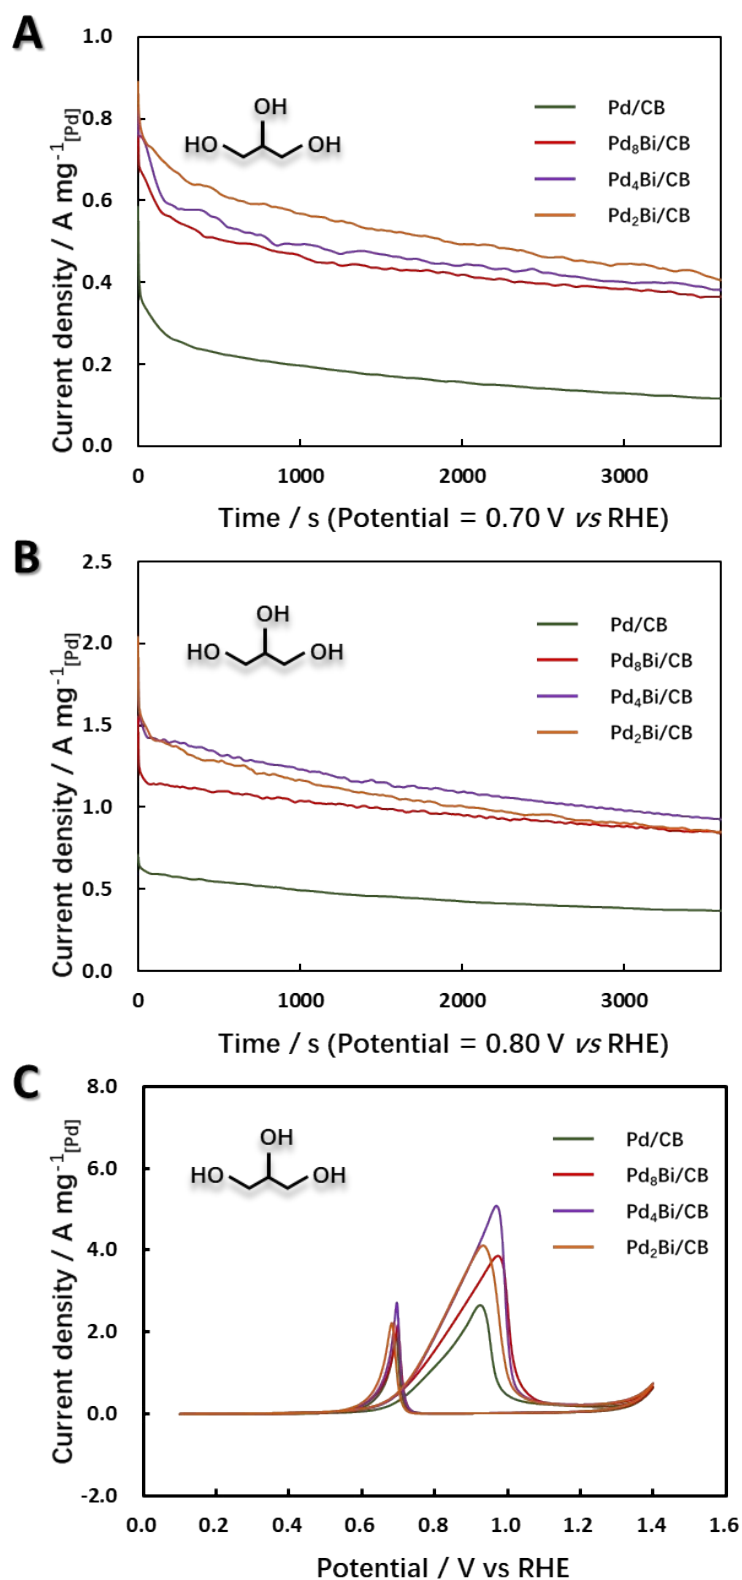

**Fig. S4.** Chronoamperometric curves at the potential of 0.70 V (A) and 0.80 V (B) recorded in 1.0 M glycerol + 1.0 M NaOH solution. CV curves of corresponding samples recorded after chronoamperometric test (C).
